# Supplementary material
Source: PubMed Central journal article supplement (PMC2732023)
Supplement: NIHMS139033-supplement-Supplement.pdf [file NIHMS139033-supplement-Supplement.pdf]

Appendix 1: Articles Excluded from Detailed Analysis

| Study, Year (Reference, See Appendix 2) | Primary Reason for Exclusion                                                                                        |
|-----------------------------------------|---------------------------------------------------------------------------------------------------------------------|
| Tod, [1] 2003                           | No economic analysis of SC/RP (qualitative study of barriers to SC)                                                 |
| Ibrahim et al, [2] 2002                 | No economic analysis of SC/RP (study of coverage of tobacco dependence programs)                                    |
| Rigotti et al, [3] 2002                 | No economic analysis of SC/RP (study of tobacco dependence treatment guidelines in managed care organizations)      |
| Buchanan, [4] 2002                      | No economic analysis of SC/RP (pilot study of DHHS tobacco treatment guidelines)                                    |
| Messecar, [5] 2001                      | No economic analysis of SC/RP (review of the evidence)                                                              |
| Frazier et al, [6] 2001                 | No economic analysis of SC/RP (study of barriers to SC initiatives for Medicaid managed care patients)              |
| Brandon, [7] 2001                       | No economic analysis of SC/RP (review of behavioral SC treatments)                                                  |
| Carr et al, [8] 2001                    | No economic analysis of SC/RP (study of SC benefits for Wisconsin Medicaid population)                              |
| Lando et al, [9] 2001                   | No economic analysis of SC/RP (comparison of two SC/RP programs with pregnant women)                                |
| Todd et al, [10] 2001                   | No economic analysis of SC/RP (review and proposal for integrated approach to prenatal SC interventions)            |
| Ershoff et al, [11] 1999                | No economic analysis of SC/RP (study of three sets of SC programs in a large-group model managed care organization) |
| Klerman et al,[12] 2000                 | No economic analysis of SC/RP (study of SC activities for pregnant women in Healthy Start projects)                 |
| Barker et al, [13] 2000                 | No economic analysis of SC/RP (profile of prenatal tobacco treatment strategies in managed care)                    |
| Nair and Brandt, [14] 2000              | No economic analysis of SC/RP (review of effects of smoking on health-care costs)                                   |
| Alexander et al, [15] 1997              | No economic analysis of SC/RP (assessment of use of prenatal care services for Medicaid women in managed care)      |
| Lightwood et al, [16] 1999              | No economic analysis of SC/RP (did not evaluate SC/RP program)                                                      |
| Law and Tang, [17] 1995                 | No economic analysis of SC/RP (review of the evidence on SC interventions)                                          |
| Li et al, [18] 1994                     | No economic analysis of SC/RP (estimate of infant costs associated with smoking)                                    |
| Cohen and Fowler, [19] 1993             | No economic analysis of SC/RP (review article)                                                                      |
| Wakefi <sup>e</sup> ld et al, [20] 1993 | No economic analysis of SC/RP (study of factors associated with SC during pregnancy among working class women)      |
| Hadow et al, [21] 1991                  | No economic analysis of SC/RP (RCT of effectiveness of cotinine-assisted interventions)                             |

Appendix 1. Articles Excluded from Detailed Analysis, continued

|                                                     |                                                                                                                      |
|-----------------------------------------------------|----------------------------------------------------------------------------------------------------------------------|
| Elixhauser, [22] 1990                               | No economic analysis of SC/RP (review article)                                                                       |
| McParlane et al, [23] 1987                          | Not comparable health outcomes (cost per visit, cost per potential kit distributed)                                  |
| Novak-Antolic, [24] 2001                            | No economic analysis of SC/RP (review of factors associated with preterm delivery)                                   |
| Scott and Alexander,[25] 1998                       | No economic analysis of SC/RP (did not evaluate SC/RP programs)                                                      |
| Binkin et al, [26] 1984                             | No economic analysis of SC/RP (did not evaluate SC/RP programs)                                                      |
| Miller et al, [27] 2001                             | No economic analysis of SC/RP (cost estimates of birth and first year for infant and mother attributable to smoking) |
| West et al, [28] 2000                               | No economic analysis of SC/RP (review article)                                                                       |
| Cotton and Watts, [29] 1995                         | No economic analysis of SC/RP (did not evaluate SC/RP program)                                                       |
| McLeod et al, [30] 2003                             | No economic analysis of SC/RP (study of factors associated with SC)                                                  |
| Klerman and Rooks, [31] 1999                        | No economic analysis of SC/RP (proposed SC intervention by midwives)                                                 |
| Wisborg et al, [32] 1998                            | No economic analysis of SC/RP (study of effectiveness of SC only)                                                    |
| Melvin, [33] 1997                                   | No economic analysis of SC/RP (review article)                                                                       |
| Valbo and Nylander, [34] 1994                       | No economic analysis of SC/RP (RCT of SC program)                                                                    |
| Thompson and Hopp, [35] 1991                        | No economic analysis of SC/RP (review of community-based SC programs)                                                |
| Ershoff et al, [36] 1989                            | No economic analysis of SC/RP (effectiveness of SC program only)                                                     |
| NHS Centre for Reviews and Dissemination, [37] 1998 | No economic analysis of SC/RP (review article)                                                                       |
| Bains et al, [38] 1998                              | No economic analysis of SC/RP (review of effectiveness of incentives for SC)                                         |
| Dolan-Mullen et al [39] 1994                        | No economic analysis of SC/RP (meta-analysis of RCT of prenatal SC interventions)                                    |
| Walsh et al, [40] 1998                              | No economic analysis of SC/RP (did not evaluate SC/RP program)                                                       |
| Barker, [41] 2000                                   | No economic analysis of SC/RP (introduction article)                                                                 |
| Warner, [42] 1997                                   | No economic analysis of SC/RP (review article)                                                                       |
| Pickett et al, [43] 2001                            | No economic analysis of SC/RP (evaluation of coverage for tobacco-dependence treatment)                              |

\*SC = Smoking Cessation. RP = Relapse Prevention.

## APPENDIX 2: EXCLUDED ARTICLES

1. Tod AM. Barriers to smoking cessation in pregnancy: a qualitative study. *Br J Community Nurs* 2003;8:56-64.
2. Ibrahim JK, Schauffler HH, Barker DC, et al . Coverage of tobacco dependence treatments for pregnant women and for children and their parents. *Am J Public Health* 2002;92:1940-2.
3. Rigotti NA, Quinn VP, Stevens VJ, et al. Tobacco-control policies in 11 leading managed care organizations: progress and challenges. *Eff Clin Pract* 2002;5:130-6.
4. Buchanan L. Implementing a smoking cessation program for pregnant women based on current clinical practice guidelines. *J Am Acad Nurse Pract* 2002;14:243-50.
5. Messecar DC. Smoking cessation interventions for pregnant women to prevent low birth weight: what does the evidence show? *J Am Acad Nurse Pract* 2001;13:171-7.
6. Frazier LM, Molgaard CA, Fredrickson DD, et al.. Barriers to smoking cessation initiatives for Medicaid clients in managed care. *Subst Use Misuse* 2001;36:1875-99.
7. Brandon TH. Behavioral tobacco cessation treatments: yesterday's news or tomorrow's headlines? *J Clin Oncol* 2001;19(Suppl.):S64-8.
8. Carr RM, Christiansen B, Jehn L, et al. Meeting the challenge of tobacco use within the Medicaid population. *WMJ* 2001;100:59-66.

9. Lando HA, Valanis BG, Lichtenstein E, et al. Promoting smoking abstinence in pregnant and postpartum patients: a comparison of 2 approaches. *Am J Manag Care* 2001;7:685-93.
10. Todd SJ, LaSala KB, Neil-Urban S. An integrated approach to prenatal smoking cessation interventions. *MCN Am J Matern Child Nurs* 2001;26:185-90; quiz 191.
11. Ershoff DH, Quinn VP, Boyd NR, et al. The Kaiser Permanente prenatal smoking-cessation trial: when more isn't better, what is enough? *Am J Prev Med* 1999;17:161-8.
12. Klerman LV, Spivey C, Raykovich KT. Smoking reduction activities in a federal program to reduce infant mortality among high risk women. *Tob Control*. 2000;9:III51-5.
13. Barker DC, Robinson LA, Rosenthal AC. A survey of managed care strategies for pregnant smokers. *Tob Control* 2000;9:III46-50.
14. Nair AK, Brandt EN, Jr. Effects of smoking on health care costs. *J Okla State Med Assoc*. 2000;93:245-50.
15. Alexander GR, Hulseley TC, Foley K, et al. An assessment of the use and impact of ancillary prenatal care services to Medicaid women in managed care. *Matern Child Health J* 1997;1:139-49.
16. Lightwood JM, Phibbs CS, Glantz SA. Short-term health and economic benefits of smoking cessation: low birth weight. *Pediatrics* 1999;104:1312-20.
17. Law M, Tang JL. An analysis of the effectiveness of interventions intended to help people stop smoking. *Arch Intern Med* 1995;155:1933-41.

18. Li CQ, Windsor RA, Hassan M. Cost differences between low birthweight attributable to smoking and low birthweight for all causes. *Prev Med* 1994;23:28-34.
19. Cohen DR, Fowler GH. Economic implications of smoking cessation therapies: a review of economic appraisals. *Pharmacoeconomics* 1993;4:331-44.
20. Wakefield M, Gillies P, Graham H, et al . Characteristics associated with smoking cessation during pregnancy among working class women. *Addiction* 1993;88:1423-30.
21. Haddow JE, Knight GJ, Kloza EM, et al. Cotinine-assisted intervention in pregnancy to reduce smoking and low birthweight delivery. *Br J Obstet Gynaecol* 1991;98:859-65.
22. Elixhauser A. The costs of smoking and the cost effectiveness of smoking-cessation programs. *J Public Health Policy* 1990;11:218-37.
23. McParlane EC, Mullen PD, DeNino LA. The cost effectiveness of an education outreach representative to OB practitioners to promote smoking cessation counseling. *Patient Educ Couns* 1987;9:263-74.
24. Novak-Antolic Z. Predicting preterm delivery and lowering very preterm delivery rate. *J Perinat Med.* 2001;29:469-75.
25. Scott LL, Alexander J. Cost-effectiveness of acyclovir suppression to prevent recurrent genital herpes in term pregnancy. *Am J Perinatol* 1998;15:57-62.

26. Binkin NJ, Koplan JP, Cates W, Jr. Preventing neonatal herpes. The value of weekly viral cultures in pregnant women with recurrent genital herpes. *JAMA* 1984;251:2816-21.
27. Miller DP, Villa KF, Hogue SL, et al. Birth and first-year costs for mothers and infants attributable to maternal smoking. *Nicotine Tob Res* 2001;3:25-35.
28. West R, McNeill A, Raw M. Smoking cessation guidelines for health professionals: an update. Health Education Authority. *Thorax* 2000;55:987-99.
29. Cotton D, Watts H. Management of HIV infection during pregnancy: new options, new questions. *AIDS Clin Care* 1995;7:45-47, 49.
30. McLeod D, Pullon S, Cookson T. Factors that influence changes in smoking behaviour during pregnancy. *N Z Med J* 2003;116:U418.
31. Klerman LV, Rooks JP. A simple, effective method that midwives can use to help pregnant women stop smoking. *J Nurse Midwifery* 1999;44:118-23.
32. Wisborg K, Henriksen TB, Secher NJ. A prospective intervention study of stopping smoking in pregnancy in a routine antenatal care setting. *Br J Obstet Gynaecol* 1998;105:1171-6.
33. Melvin CL. Pregnant women, infants, and the cost savings of smoking cessation. *Tob Control* 1997;6(suppl.):S89-91.
34. Valbo A, Nylander G. Smoking cessation in pregnancy. Intervention among heavy smokers. *Acta Obstet Gynecol Scand* 1994;73:215-9.

35. Thompson B, Hopp HP. Community-based programs for smoking cessation. *Clin Chest Med* 1991;12:801-18.
36. Ershoff DH, Mullen PD, Quinn VP. A randomized trial of a serialized self-help smoking cessation program for pregnant women in an HMO. *Am J Public Health* 1989;79:182-7.
37. Dissemination NCfRa. Smoking cessation: what the health service can do. *Effectiveness Matters* 1998;3:4.
38. Bains N, Pickett W, Hoey J. The use and impact of incentives in population-based smoking cessation programs: a review. *Am J Health Promot* 1998;12:307-20.
39. Dolan-Mullen P, Ramirez G, Groff JY. A meta-analysis of randomized trials of prenatal smoking cessation interventions. *Am J Obstet Gynecol* 1994;171:1328-34.
40. Walsh RA, Girgis A, Sanson-Fisher RW. Breaking bad news. 2: What evidence is available to guide clinicians? *Behav Med* 1998;24:61-72.
41. Barker DC. III. Maternal smoking cessation: a cost effective strategy for managed care. Introduction. *Tob Control* 2000;9:160.
42. Warner KE. Cost effectiveness of smoking-cessation therapies. Interpretation of the evidence-and implications for coverage. *Pharmacoeconomics* 1997;11:538-49.

43. Pickett KE, Abrams B, Schauffler HH, et al. Coverage of tobacco dependence treatments for pregnant smokers in health maintenance organizations. *Am J Public Health* 2001;91:1393-4.
